# Supplementary material for: Prediction of impurity concentrations in AlN single crystals by absorption at 230 nm using random forest regression
Source: Royal Society of Chemistry journal article supplement (doi:10.1039/d4ce00813h), 2024-12-05
Supplement: d4ce00813h1.xlsx [file d4ce00813h1.xlsx]

## Sheet: T1
	210	211	212	213	214	215	216	217	218	219	220	221	222	223	224	225	226	227	228	229	230	231	232	233	234	235	236	237	238	239	240	241	242	243	244	245	246	247	248	249	250	251	252	253	254	255	256	257	258
C-1	293.21	270.185	270.264	256.826	270.416	256.974	257.045	247.526	234.079	224.556	214.007	203.732	191.028	179.658	168.044	156.671	147.005	136.777	127.39	119.216	111.143	103.568	97.1475	91.1804	85.5651	80.7193	76.6439	73.3238	70.1941	68.2168	67.2398	66.819	67.8666	70.3673	74.1448	79.874	86.7155	95.9805	106.432	117.753	129.724	142.25	152.9	163.147	169.384	176.106	177.078	179.071	183.41
C-2	219.969	205.322	195.221	186.15	179.055	172.341	165.328	159.558	153.154	146.981	141.104	134.978	128.869	123.326	117.741	112.257	107.197	102.185	97.4776	93.1266	89.0783	85.1039	81.5074	78.0689	74.8695	71.8335	69.0964	66.5031	64.1031	61.9005	59.8107	57.9843	56.3598	54.7896	53.576	52.4074	51.7686	51.1865	50.8746	50.6087	50.6231	50.6154	50.8871	50.9428	51.0413	50.9877	50.9338	50.7293	50.4622
C-3	216.457	196.945	182.296	174.934	169.735	162.534	156.637	151.647	146.11	141.039	135.772	131.241	125.949	120.841	116.589	111.835	107.564	103.463	99.5321	96.0263	92.5505	89.4118	86.2285	83.3307	81.0531	78.6708	76.5006	74.3786	72.2208	70.3564	69.0464	67.0677	65.5764	64.4465	63.1025	61.5116	60.3129	58.9079	57.7219	56.3479	55.0799	53.6011	52.2555	51.5102	50.122	48.8729	48.0641	46.7969	45.4322
C-4	270.105	256.67	256.749	256.826	247.311	247.384	240.018	234.011	228.941	220.63	211.106	203.732	195.915	188.189	179.718	172.124	164.572	157.327	150.053	143.378	137.234	131.06	125.448	120.3	115.389	110.719	106.281	102.376	98.6104	95.1524	92.0269	88.9689	86.492	84.3704	82.3238	80.7189	79.3441	78.4721	77.721	77.2742	76.976	76.6335	76.3877	76.0513	75.8555	75.299	74.7965	74.1281	73.3043
C-5	256.589	256.67	256.749	256.826	247.311	247.384	247.456	247.526	240.156	240.223	234.211	224.686	220.822	211.294	206.215	197.897	189.783	182.113	174.96	167.576	160.339	152.953	146.532	140.179	134.312	128.646	123.62	119.093	114.966	111.574	108.627	106.503	104.951	104.551	104.701	105.973	108.133	111.226	115.223	119.926	125.389	130.699	136.151	141.324	145.902	149.908	153.034	155.465	157.024
C-6	187.275	183.429	181.126	177.921	175.009	172.341	169.88	166.115	162.743	158.523	154.281	149.643	144.442	139.633	134.601	129.284	124.305	119.456	114.776	110.284	106.103	101.983	98.1424	94.4611	91.1548	87.9522	84.8536	82.1947	79.5815	77.1157	74.78	72.5183	70.4839	68.4964	66.5198	64.6578	62.8981	61.0524	59.3912	57.652	56.0784	54.482	52.8696	51.2471	49.8909	48.2699	46.994	45.6754	44.5332
C-7	247	247.081	247.159	247.236	247.311	247.384	247.456	247.526	240.156	240.223	240.288	234.275	234.337	229.26	224.869	221.002	217.547	214.426	211.581	208.966	206.549	204.301	202.2	202.25	202.299	202.346	202.393	202.439	204.636	206.98	207.023	209.536	212.246	212.287	212.327	215.267	215.306	215.344	215.382	215.418	215.455	215.49	215.525	215.56	215.594	215.627	212.759	215.692	215.723
C-8	256.589	256.67	247.159	247.236	247.311	256.974	257.045	247.526	257.184	247.661	247.727	247.79	247.853	240.476	240.536	234.517	229.436	225.041	217.658	211.634	204.249	198.223	190.103	182.426	175.268	168.626	161.847	156.754	151.889	148.058	145.747	144.672	145.082	147.029	150.8	156.051	161.658	168.385	174.948	178.798	182.011	184.347	184.382	185.628	185.662	184.483	184.516	184.548	184.58
C-9	270.105	270.185	270.264	270.341	270.416	270.489	270.561	270.631	270.699	270.766	270.831	270.895	270.958	271.019	271.079	271.137	271.195	257.735	257.79	257.844	257.897	248.359	248.41	241.022	241.07	241.118	235.088	235.133	235.179	230.084	230.128	230.17	225.761	225.802	225.843	221.956	221.995	222.033	222.071	222.107	222.144	222.179	222.214	222.249	222.283	222.316	218.837	218.869	218.9
C-10	293.21	293.29	293.369	293.446	293.521	293.594	293.666	293.736	293.804	293.871	293.936	294	294.063	294.124	294.184	294.242	294.3	271.251	271.306	271.36	271.413	271.464	257.999	258.049	258.098	258.146	258.192	258.238	258.283	258.328	258.371	258.414	258.455	258.497	258.537	248.987	258.615	258.653	258.691	258.728	258.764	258.8	258.835	258.869	258.903	258.936	258.969	259.001	259.033
O-1	183.348	170.328	160.403	152.309	145.827	140.424	135.213	130.475	125.906	121.146	116.504	111.733	107.204	102.693	98.3556	94.0342	90.0026	86.0291	82.3745	78.8317	75.4519	72.3075	69.365	66.5621	63.9183	61.3844	59.0641	56.7689	54.6765	52.7823	50.819	49.0938	47.4574	45.6208	43.9198	42.2886	40.7852	39.4268	37.8602	36.3118	34.9424	33.6814	32.2966	31.0883	29.8794	28.7594	27.6994	26.7156	25.752
O-2	101.249	90.4788	82.6249	77.0996	73.0888	70.335	68.1446	66.3859	64.7899	63.3708	62.0137	60.6833	59.4077	58.2948	57.1123	55.9994	55.1026	54.1572	53.288	52.4194	51.7566	51.0187	50.3417	49.8719	49.2615	48.8077	48.4014	47.9599	47.7038	47.4693	47.1187	46.8882	46.794	46.5652	46.3569	46.2821	46.1127	46.0189	45.813	45.5712	45.3495	45.2566	44.9462	44.6566	44.4583	44.0851	43.8204	43.6096	43.2291
O-3	207.711	193.433	183.508	174.934	168.148	161.886	156.095	150.721	144.941	139.706	134.354	128.807	123.464	118.358	113.207	108.253	103.407	98.8096	94.4497	90.313	86.4488	82.5902	79.0901	75.7906	72.6685	69.6658	66.8472	64.2223	61.643	59.2268	56.9271	54.5847	52.5163	50.2506	48.2149	46.1497	44.2099	42.197	40.4615	38.5911	36.8812	35.111	33.613	31.9513	30.5932	29.0797	27.8486	26.5409	25.4537
O-4	80.6047	69.9091	62.2822	56.9257	53.2064	50.683	48.7505	47.2552	46.0244	44.8978	43.8296	42.7976	41.885	40.999	40.1381	39.3641	38.6247	37.8578	37.2569	36.6965	36.0753	35.5639	34.9926	34.6471	34.2653	33.8225	33.5805	33.16	32.91	32.7123	32.3779	32.2327	32.1124	31.894	31.689	31.606	31.4746	31.3794	31.2481	31.034	30.9272	30.8439	30.7137	30.5487	30.4075	30.3011	30.149	30.0316	29.7218
O-5	123.624	111.734	103.024	96.4229	91.6328	87.8071	84.7028	81.9895	79.4894	77.0221	74.64	72.2949	70.1112	67.88	65.8306	63.7734	61.8417	60.1095	58.4396	56.774	55.2934	53.9281	52.5266	51.4316	50.3303	49.3088	48.4014	47.6791	46.993	46.3409	45.7586	45.3348	44.8256	44.4682	44.1681	43.8883	43.5586	43.3704	42.9603	42.5555	42.2392	41.7286	41.2424	40.891	40.3235	39.7815	39.2489	38.8594	38.2834
O-6	152.56	135.711	123.374	114.894	108.683	104.144	100.467	97.3509	94.5117	92.0607	89.7851	87.4577	85.48	83.4985	81.5772	79.8731	78.3074	76.67	75.299	73.8963	72.7678	71.6372	70.5461	69.6864	68.9259	68.0354	67.3863	66.8573	66.2673	65.8947	65.5605	65.2973	65.1031	64.9099	64.7176	64.6578	64.5648	64.4716	64.3457	64.2199	64.0621	63.7448	63.3992	62.9017	62.5038	61.96	61.4255	60.8999	60.2973
O-7	179.836	166.402	156.34	148.222	142.078	136.61	132.193	127.845	124.013	120.222	116.504	112.588	108.966	105.476	102.013	98.5079	95.3461	92.3112	89.3244	86.5912	83.9517	81.5684	79.1938	77.0803	75.0978	73.3179	71.6322	70.0706	68.5449	67.2684	66.007	64.794	63.626	62.6551	61.5624	60.6523	59.626	58.6871	57.7486	56.7597	55.8763	54.8947	53.848	52.9496	51.9646	50.8798	49.9563	49.1814	48.2859
O-8	190.175	182.217	173.918	166.557	159.943	154.448	149.308	144.491	139.967	135.998	131.943	128.11	124.477	121.026	117.909	115.067	112.457	109.779	107.675	105.586	103.952	102.294	100.818	99.7906	98.703	97.9232	97.5191	96.9437	96.8133	96.8575	96.9009	97.2069	97.6925	98.1833	98.7715	99.1813	99.5947	100.012	100.144	99.9909	99.6494	99.0342	98.161	97.1372	95.894	94.4566	93.0809	91.4688	90.073
O-9	148.416	130.784	120.271	114.581	110.011	106.982	104.443	102.305	100.202	98.8964	96.8228	95.1322	93.528	92.3917	91.0691	89.7282	88.5118	87.6774	87.1959	86.2667	85.4903	85.0418	84.6609	84.4056	84.0321	84.2601	84.1865	84.2324	84.2774	84.6838	85.2163	85.6305	86.3645	87.1125	87.5448	88.1813	88.8279	89.4851	89.8014	89.7683	90.0852	89.4926	89.0471	88.4068	87.5186	86.8448	85.5069	84.755	83.5577
O-10	117.615	105.825	97.4479	91.2471	86.9111	83.9443	81.9196	80.5135	79.1153	78.0332	77.1371	76.2666	75.4202	74.5966	73.9742	73.4083	72.6797	72.1795	71.6873	71.2028	70.8879	70.5357	70.1874	69.882	69.5793	69.3949	69.2111	69.1041	68.959	68.8519	68.7822	68.7496	68.7913	68.7199	68.8724	68.7622	68.8757	68.8764	68.8764	68.8013	68.726	68.5029	68.3909	68.0971	67.8418	67.4817	67.2664	66.843	66.4939
O-11	171.059	155.71	149.37	144.462	140.461	137.084	135.598	131.593	129.298	127.224	125.334	123.598	121.213	119.066	117.759	116.528	115.365	113.713	112.692	111.717	110.786	109.895	109.039	108.218	107.835	107.459	107.09	107.12	106.757	106.4	106.815	106.457	106.485	106.513	106.926	106.566	106.592	107.004	106.642	106.667	106.311	106.335	105.617	106.008	105.302	104.618	104.64	103.978	103.665
O-12	176.659	153.635	139.532	132.503	127.401	123.599	121.507	119.545	117.195	116.115	114.608	113.465	112.506	111.023	110.27	109.275	108.31	107.743	107.066	106.521	105.638	105.46	105.169	104.993	104.483	104.42	104.138	104.184	104.011	104.164	103.99	104.032	104.291	104.661	104.482	104.961	105.334	105.597	105.747	105.784	106.161	105.856	105.891	105.7	105.622	105.655	104.805	104.728	104.328
O-13	210.379	207.792	205.401	201.026	197.175	193.737	189.149	185.133	181.561	177.321	173.572	169.411	166.441	162.416	159.415	156.138	153.163	150.44	148.343	145.601	143.791	141.737	140.129	138.599	137.139	136.027	134.679	133.915	132.91	132.442	131.73	131.279	131.077	130.635	130.436	130.476	130.042	129.846	129.651	129.458	129.037	128.399	127.557	126.948	126.144	124.758	124.007	122.896	121.823
O-14	228.346	213.361	200.949	191.962	186.225	180.221	175.154	170.773	166.183	162.163	158.019	153.844	150.147	146.43	142.741	139.43	135.847	132.622	129.453	126.567	123.918	121.103	118.854	116.593	114.183	112.079	110.105	108.123	106.372	104.824	103.03	101.431	100.005	98.5476	96.9792	95.7351	94.2159	92.9193	91.5994	90.261	89.0447	87.7418	86.49	85.164	83.9492	82.6104	81.4333	80.4025	79.3533
O-15	193.352	175.745	166.48	159.268	154.892	151.978	149.308	146.441	143.442	140.366	138.489	136.127	134.203	132.131	130.429	128.352	127.279	125.815	124.416	123.469	122.742	121.657	120.429	119.769	119.818	119	118.876	118.753	118.461	118.338	118.717	118.424	118.801	119.18	119.051	119.431	119.299	119.679	119.717	119.582	119.79	119.484	119.012	118.713	118.253	117.48	117.195	116.756	115.866
O-16	164.871	154.144	145.675	139.609	135.357	132.385	129.911	128.076	126.562	125.118	123.941	122.808	121.714	120.841	119.993	119.342	118.534	118.081	117.469	117.195	116.922	116.652	116.384	116.434	116.482	116.53	116.736	117.102	117.309	117.678	118.215	118.928	119.481	120.042	120.61	121.186	121.769	121.991	122.213	122.25	122.102	121.771	121.264	120.414	119.587	118.45	117.512	116.292	115.266
O-17	256.589	239.642	228.505	220.205	213.591	208.096	203.398	199.295	195.656	190.836	186.641	182.927	179.597	175.612	172.065	168.869	165.962	162.648	160.233	156.894	154.361	152.014	149.826	147.779	145.474	143.68	141.642	140.046	138.526	137.075	135.688	134.358	133.082	131.608	130.675	129.306	128.215	126.946	125.932	124.55	123.417	122.137	120.908	119.724	118.417	117.004	115.651	114.498	113.385
O-18	193.352	179.917	170.406	163.045	157.043	152.458	148.873	146.042	143.442	141.381	139.771	137.93	136.483	135.101	133.778	133.033	132.049	131.345	130.656	129.983	129.559	129.375	129.192	129.01	128.828	128.875	129.153	129.431	129.946	130.466	130.75	131.773	132.57	133.383	134.214	135.063	135.932	136.535	137.147	137.475	137.805	138.137	137.876	137.91	137.359	137.104	136.567	136.039	135.519
O-19	198.769	185.994	176.819	168.857	162.46	158.246	154.011	150.721	148.156	145.783	143.575	141.51	139.572	138.053	136.901	135.504	134.44	133.412	132.677	131.958	131.506	130.814	130.621	130.187	130.236	130.284	130.331	130.377	130.662	130.949	131.237	132.023	132.57	133.383	133.948	134.791	135.376	135.97	136.573	137.184	137.805	138.137	138.471	138.505	138.841	138.572	138.605	138.637	138.37
O-20	293.21	293.29	293.369	293.446	293.521	293.594	293.666	293.736	293.804	293.871	293.936	270.895	270.958	257.504	257.563	248.033	240.652	234.631	225.096	221.224	214.588	206.601	202.2	196.522	191.684	186.163	181.44	177.313	173.651	169.575	165.264	161.456	158.047	154.467	151.241	147.902	144.149	141.108	138.028	134.942	131.876	129.073	126.075	123.522	120.623	118.124	115.651	113.354	111.208
O-21	293.21	293.29	293.369	293.446	293.521	293.594	293.666	293.736	293.804	293.871	293.936	294	294.063	271.019	271.079	257.622	248.09	248.146	234.686	229.601	225.203	217.816	211.79	206.701	200.278	196.618	190.296	186.256	181.531	177.403	173.739	168.894	165.349	161.539	158.128	154.547	150.878	147.58	144.225	141.183	138.101	135.286	132.194	129.599	127.195	124.56	122.307	120.199	118.058
Si-1	247	239.642	228.505	216.693	208.023	201.175	193.808	187.801	180.431	174.42	167.048	160.423	153.413	147.233	140.678	134.383	128.409	122.773	117.141	112.057	107.293	102.503	98.0507	93.8108	89.9879	86.2463	82.7184	79.3804	76.2595	73.2834	70.3208	67.5706	64.9691	62.2526	59.6899	57.2893	54.9567	52.5523	50.3791	48.2034	46.1094	43.9503	42.1757	40.1495	38.4211	36.6695	35.1292	33.6987	32.33
Si-2	233.484	228.427	228.505	224.131	224.206	220.353	216.913	213.806	210.974	205.902	201.517	195.852	191.028	185.521	180.811	176.697	172.181	167.467	163.35	159.696	155.888	152.48	148.972	146.191	143.275	140.6	138.435	136.406	134.228	132.442	130.992	129.374	128.278	127.003	125.985	124.999	124.043	123.306	122.399	121.699	121.194	120.171	119.349	118.548	117.767	116.848	115.803	114.938	113.953
Si-3	293.21	270.185	270.264	270.341	270.416	270.489	270.561	257.115	257.184	247.661	240.288	234.275	229.199	220.883	214.254	206.274	199.859	192.872	187.115	181.091	175.067	169.98	165.58	161.092	157.689	154.116	150.897	147.968	145.659	143.505	141.821	140.221	139.005	137.834	136.704	135.893	135.376	134.598	134.102	133.614	133.134	132.66	132.194	131.735	131.282	131.074	130.395	130.194	129.762
Si-4	233.484	233.565	233.644	233.721	239.873	239.946	240.018	240.088	240.156	240.223	240.288	240.352	247.853	247.914	247.974	248.033	248.09	248.146	248.201	248.255	240.87	240.921	240.972	241.022	241.07	235.041	235.088	235.133	230.04	230.084	225.677	225.719	221.835	221.876	218.404	215.267	215.306	212.444	209.813	207.38	205.116	203.001	201.015	199.144	197.375	194.073	192.555	189.686	188.357
Si-5	233.484	233.565	233.644	233.721	233.796	233.869	240.018	240.088	240.156	240.223	240.288	240.352	240.415	240.476	240.536	240.594	240.652	240.708	240.763	240.817	240.87	240.921	240.972	241.022	234.993	235.041	235.088	229.995	230.04	225.633	225.677	225.719	221.835	218.364	218.404	215.267	212.405	212.444	209.813	207.38	205.116	203.001	201.015	199.144	197.375	195.699	194.105	191.105	189.718
Si-6	270.105	270.185	270.264	270.341	270.416	270.489	270.561	270.631	270.699	270.766	270.831	294	294.063	294.124	294.184	294.242	294.3	294.356	294.411	294.465	294.517	294.569	294.62	294.67	271.613	271.661	271.708	271.754	271.799	271.843	271.887	271.929	271.971	272.012	272.052	272.092	258.615	258.653	258.691	258.728	258.764	258.8	258.835	258.869	249.314	249.347	249.38	249.412	249.443
[truncated: 342 more columns]
