# Supplementary material for: Prediction of impurity concentrations in AlN single crystals by absorption at 230 nm using random forest regression
Source: Royal Society of Chemistry journal article supplement (doi:10.1039/d4ce00813h), 2024-12-05
Supplement: d4ce00813h2.xlsx [file d4ce00813h2.xlsx]

## Sheet: GBR
	SIMS Original				AI Prediction Gradient Boosting				Percent Error
	C	O	Si		C	O	Si
C-1	11.24	9.81	9.89		17.1685	24.0945	11.5106		0.527444	1.45612	0.163866
C-2	11.62	21.76	14.26		13.9999	23.4062	24.8004		0.204814	0.0756541	0.73916
C-3	11.82	20.26	16.72		7.09565	29.4034	17.7865		0.66581	0.451305	0.0637858
C-4	12.19	24.67	14.24		16.0794	23.4846	26.3588		0.319067	0.0504762	0.851037
C-5	15.82	23.2	14.23		15.1193	20.9872	22.5869		0.0463465	0.105436	0.587272
C-6	16.42	14.37	36.98		12.4553	20.3638	19.1803		0.318311	0.417105	0.928022
C-7	25.19	6.14	35.63		37.6062	10.7582	42.6822		0.492904	0.752144	0.197929
C-8	25.69	21.63	11.42		13.0661	16.1435	15.9225		0.966155	0.339856	0.394263
C-9	56.25	6.16	45.66		25.4102	7.00866	150.979		1.21368	0.137769	2.3066
C-10	171.35	5.14	139.15		54.9107	187.13	117.003		2.12052	35.4067	0.189284
O-1	7.97	12.76	15.34		8.32983	23.7071	28.3545		0.0451485	0.85792	0.848402
O-2	2.19	20.58	10.36		7.55168	37.2984	10.9594		2.44826	0.81236	0.057855
O-3	10.76	25.39	15.14		8.47859	14.686	14.3762		0.26908	0.728853	0.053128
O-4	2.04	25.95	2.39		5.76726	36.0193	7.98253		1.82709	0.388027	2.33997
O-5	4.69	27.62	5.38		2.72678	26.5904	5.16781		0.719978	0.0387193	0.0410605
O-6	4.43	39.11	12.97		3.68112	45.3714	4.90525		0.203438	0.160097	1.6441
O-7	7	38.55	7.44		4.5124	21.4615	10.0283		0.551283	0.796243	0.347889
O-8	4.2	46.57	25.95		10.1456	66.3308	15.4068		1.41563	0.424324	0.684325
O-9	2.57	49.63	13.33		10.3226	26.2627	27.3345		3.01659	0.889751	1.0506
O-10	1.75	68.38	6.18		2.56123	40.3367	4.25863		0.46356	0.695232	0.451171
O-11	3.97	71.58	2.1		2.22153	101.653	18.6936		0.787056	0.420131	7.90173
O-12	2.12	81.4	3.27		2.4476	142.502	26.1115		0.154529	0.750639	6.98515
O-13	3.7	97.62	44.77		7.94037	133.947	41.4643		1.14605	0.372125	0.0797227
O-14	9.75	107.32	4.42		7.39466	46.2429	24.7975		0.318518	1.32079	4.6103
O-15	4.48	127.7	12.74		6.40321	178.413	27.0555		0.429289	0.397129	1.12366
O-16	2.41	143.63	13.42		2.94515	83.5865	3.24944		0.222055	0.71834	3.12994
O-17	9.49	164.06	4.94		6.8633	132.057	23.7541		0.382718	0.242338	3.80853
O-18	12	184	7		3.12709	105.861	69.2217		2.83744	0.738122	8.88881
O-19	8	187	9		9.37511	104.755	185.292		0.171889	0.785124	19.588
O-20	24.68	221.42	3.51		23.372	227.44	-0.413259		0.0559645	0.0271898	-9.49347
O-21	22.94	287.99	3.46		10.6839	143.313	221.733		1.14715	1.00952	63.0847
Si-1	14.31	13.65	53.8		11.0034	15.917	18.7629		0.30051	0.166084	1.86736
Si-2	5	48	91		8.49471	91.0865	11.6302		0.698943	0.897635	6.82443
Si-3	10	14	129		14.3112	112.11	47.1769		0.43112	7.00783	1.73439
Si-4	14.75	50.26	186.29		5.95507	56.2454	181.887		1.47688	0.119089	0.0242091
Si-5	5	42	212		14.7498	74.3629	173.559		1.94995	0.770546	0.22149
Si-6	6	22	289		158.291	224.248	140.511		25.3818	9.19308	1.05678
								AVG	1.50613	1.88972	3.6588
								SUM				7.05466
