# Supplementary material for: Prediction of impurity concentrations in AlN single crystals by absorption at 230 nm using random forest regression
Source: Royal Society of Chemistry journal article supplement (doi:10.1039/d4ce00813h), 2024-12-05
Supplement: d4ce00813h3.xlsx [file d4ce00813h3.xlsx]

## Sheet: RandomForestFinal
	Percent Error
	Random Forest Model					Gradient Boosting Model
	C	O	Si			C	O	Si
C-1	0.781249	1.17284	2.12076			0.527444	1.45612	0.163866
C-2	0.139998	0.125598	0.408425			0.204814	0.0756541	0.73916
C-3	0.503303	0.586809	0.000985361			0.66581	0.451305	0.0637858
C-4	0.4451	0.388495	0.757612			0.319067	0.0504762	0.851037
C-5	0.147003	0.161786	1.05889			0.0463465	0.105436	0.587272
C-6	0.228375	0.453164	0.780133			0.318311	0.417105	0.928022
C-7	0.381754	3.20293	1.16846			0.492904	0.752144	0.197929
C-8	0.221782	0.0560884	2.4859			0.966155	0.339856	0.394263
C-9	0.780904	3.7766	0.940306			1.21368	0.137769	2.3066
C-10	7.03964	9.76038	1.1016			2.12052	35.4067	0.189284
O-1	0.270841	0.848636	0.00771359			0.0451485	0.85792	0.848402
O-2	2.41232	0.573562	0.340648			2.44826	0.81236	0.057855
O-3	0.0631476	0.33027	0.206375			0.26908	0.728853	0.053128
O-4	2.6915	0.681495	5.33274			1.82709	0.388027	2.33997
O-5	0.652221	0.493504	1.90024			0.719978	0.0387193	0.0410605
O-6	0.190111	0.228083	0.0238899			0.203438	0.160097	1.6441
O-7	0.199701	0.660642	0.874947			0.551283	0.796243	0.347889
O-8	1.16811	0.0624098	0.266895			1.41563	0.424324	0.684325
O-9	3.28667	0.575302	0.59982			3.01659	0.889751	1.0506
O-10	1.95593	0.360381	1.32682			0.46356	0.695232	0.451171
O-11	2.01914	0.289739	17.3377			0.787056	0.420131	7.90173
O-12	3.66092	0.959084	3.94693			0.154529	0.750639	6.98515
O-13	1.81738	0.559476	0.867011			1.14605	0.372125	0.0797227
O-14	0.421929	1.28213	3.74436			0.318518	1.32079	4.6103
O-15	1.41181	0.214176	1.68623			0.429289	0.397129	1.12366
O-16	1.88283	0.751417	0.893895			0.222055	0.71834	3.12994
O-17	0.116148	0.350992	3.99959			0.382718	0.242338	3.80853
O-18	0.283877	0.570356	6.19823			2.83744	0.738122	8.88881
O-19	2.10428	1.51091	12.8867			0.171889	0.785124	19.588
O-20	1.13722	0.637877	7.50519			0.0559645	0.0271898	-9.49347
O-21	0.643836	1.52538	23.0292			1.14715	1.00952	63.0847
Si-1	0.108259	0.634614	2.23136			0.30051	0.166084	1.86736
Si-2	1.41002	0.776615	2.26749			0.698943	0.897635	6.82443
Si-3	0.42042	9.1088	2.25525			0.43112	7.00783	1.73439
Si-4	0.876528	0.81421	0.525311			1.47688	0.119089	0.0242091
Si-5	1.82535	1.55345	1.57292			1.94995	0.770546	0.22149
Si-6	3.14229	4.85682	2.85094			25.3818	9.19308	1.05678
AVG	1.266	1.37554	3.12166			1.50613	1.88972	3.6588
SUM				5.7632					7.05466
