# Supplementary material for: Prediction of impurity concentrations in AlN single crystals by absorption at 230 nm using random forest regression
Source: Royal Society of Chemistry journal article supplement (doi:10.1039/d4ce00813h), 2024-12-05
Supplement: d4ce00813h4.xlsx [file d4ce00813h4.xlsx]

## Sheet: Random Forest
	SIMS Original				AI Prediction Random Forest				Percent Error
	C	O	Si		C	O	Si
C-1	11.24	9.81	9.89		20.0212	21.3155	30.8643		0.781249	1.17284	2.12076		[ 0.
C-2	11.62	21.76	14.26		13.2468	19.3319	20.0841		0.139998	0.125598	0.408425		1
C-3	11.82	20.26	16.72		7.86269	32.1487	16.7035		0.503303	0.586809	0.000985361		2
C-4	12.19	24.67	14.24		17.6158	17.7674	25.0284		0.4451	0.388495	0.757612		3
C-5	15.82	23.2	14.23		18.1456	19.9693	29.298		0.147003	0.161786	1.05889		4
C-6	16.42	14.37	36.98		13.3672	20.882	20.7737		0.228375	0.453164	0.780133		5
C-7	25.19	6.14	35.63		34.8064	25.806	77.2624		0.381754	3.20293	1.16846		6
C-8	25.69	21.63	11.42		21.0267	22.8432	39.809		0.221782	0.0560884	2.4859		7
C-9	56.25	6.16	45.66		31.5851	29.4238	88.5944		0.780904	3.7766	0.940306		8
C-10	171.35	5.14	139.15		21.3132	55.3084	66.2115		7.03964	9.76038	1.1016		9
O-1	7.97	12.76	15.34		10.1286	23.5886	15.2226		0.270841	0.848636	0.00771359		10
O-2	2.19	20.58	10.36		7.47299	32.3839	13.8891		2.41232	0.573562	0.340648		11
O-3	10.76	25.39	15.14		11.4395	19.0864	18.2645		0.0631476	0.33027	0.206375		12
O-4	2.04	25.95	2.39		7.53065	43.6348	15.1353		2.6915	0.681495	5.33274		13
O-5	4.69	27.62	5.38		7.74892	41.2506	15.6033		0.652221	0.493504	1.90024		14
O-6	4.43	39.11	12.97		5.27219	48.0303	13.2799		0.190111	0.228083	0.0238899		15
O-7	7	38.55	7.44		8.39791	23.2139	13.9496		0.199701	0.660642	0.874947		16
O-8	4.2	46.57	25.95		9.10605	49.4764	20.4832		1.16811	0.0624098	0.266895		17
O-9	2.57	49.63	13.33		11.0168	31.5051	21.3256		3.28667	0.575302	0.59982		18
O-10	1.75	68.38	6.18		5.17287	50.2653	14.3797		1.95593	0.360381	1.32682		19
O-11	3.97	71.58	2.1		11.986	92.3195	38.5091		2.01914	0.289739	17.3377		20
O-12	2.12	81.4	3.27		9.88114	159.469	16.1765		3.66092	0.959084	3.94693		21
O-13	3.7	97.62	44.77		10.4243	152.236	23.9795		1.81738	0.559476	0.867011		22
O-14	9.75	107.32	4.42		6.85688	47.0262	20.9701		0.421929	1.28213	3.74436		23
O-15	4.48	127.7	12.74		10.8049	155.05	34.2226		1.41181	0.214176	1.68623		24
O-16	2.41	143.63	13.42		6.94762	82.0079	25.4161		1.88283	0.751417	0.893895		25
O-17	9.49	164.06	4.94		8.50246	121.437	24.698		0.116148	0.350992	3.99959		26
O-18	12	184	7		15.4065	117.171	50.3876		0.283877	0.570356	6.19823		27
O-19	8	187	9		24.8343	74.4749	124.98		2.10428	1.51091	12.8867		28
O-20	24.68	221.42	3.51		11.5477	135.187	29.8532		1.13722	0.637877	7.50519		29
O-21	22.94	287.99	3.46		13.9552	114.038	83.141		0.643836	1.52538	23.0292		30
Si-1	14.31	13.65	53.8		12.9121	22.3125	16.6493		0.108259	0.634614	2.23136		31
Si-2	5	48	91		12.0501	85.2775	27.8501		1.41002	0.776615	2.26749		32
Si-3	10	14	129		14.2042	141.523	39.6283		0.42042	9.1088	2.25525		33
Si-4	14.75	50.26	186.29		27.6788	91.1822	122.132		0.876528	0.81421	0.525311		34
Si-5	5	42	212		14.1268	107.245	82.3966		1.82535	1.55345	1.57292		35
Si-6	6	22	289		24.8537	128.85	75.0467		3.14229	4.85682	2.85094		36
								AVG	1.266	1.37554	3.12166
								SUM				5.7632
