# Supplementary material for: Prediction of impurity concentrations in AlN single crystals by absorption at 230 nm using random forest regression
Source: Royal Society of Chemistry journal article supplement (doi:10.1039/d4ce00813h), 2024-12-05
Supplement: d4ce00813h5.xlsx [file d4ce00813h5.xlsx]

## Sheet: Final
	C [1017 cm-3]	O [1017 cm-3]	Si [1017 cm-3]
C-1	11	10	10
C-2	12	22	14
C-3	12	20	17
C-4	12	25	14
C-5	16	23	14
C-6	16	14	37
C-7	25	6	35
C-8	26	22	11
C-9	56	6	46
C-10	171	5	139
O-1	8	13	15
O-2	2	21	10
O-3	10	25	15
O-4	2	26	2
O-5	5	28	5
O-6	4	39	13
O-7	7	39	7
O-8	4	47	26
O-9	3	50	13
O-10	2	68	6
O-11	4	72	2
O-12	2	81	3
O-13	4	98	45
O-14	10	107	4
O-15	4	128	13
O-16	2	144	13
O-17	9	164	5
O-18	11.63	184.05	6.61
O-19	7.84	186.8	8.68
O-20	25	221	4
O-21	23	288	3
Si-1	14	14	54
Si-2	4.86	47.57	91
Si-3	10.36	13.54	129.42
Si-4	14.75	50.26	186.29
Si-5	5.14	42.16	211.85
Si-6	5.57	21.98	289.13
